# Supplementary material for: A polyester–polystyrene hybrid connected by dynamic covalent bonds prepared via radical polymerization of styrene in a “RAFT gel”
Source: Royal Society of Chemistry journal article supplement (doi:10.1039/c4py00052h), 2014-01-01
Supplement: c4py00052h1.pdf [file c4py00052h1.pdf]

**A Polyester/Polystyrene Hybrid Connected by Dynamic Covalent Bonds Prepared  
via Radical Polymerization of Styrene in a “RAFT Gel”**

*Daiki Yoshimura, Shinji Yamada, Akinori Takasu\**

*Department of Frontier Materials, Graduate School of Engineering, Nagoya Institute  
of Technology, Gokiso-cho, Showa-ku, Nagoya 466-8555, Japan*

AUTHOR EMAIL ADDRESS: [takasu.akinori@nitech.ac.jp](mailto:takasu.akinori@nitech.ac.jp)

\*To whom correspondence should be addressed: Telephone: +81-52-735-7159. Fax:

+81-52-735-5342. E-mail [takasu.akinori@nitech.ac.jp](mailto:takasu.akinori@nitech.ac.jp)

**Supporting Information**

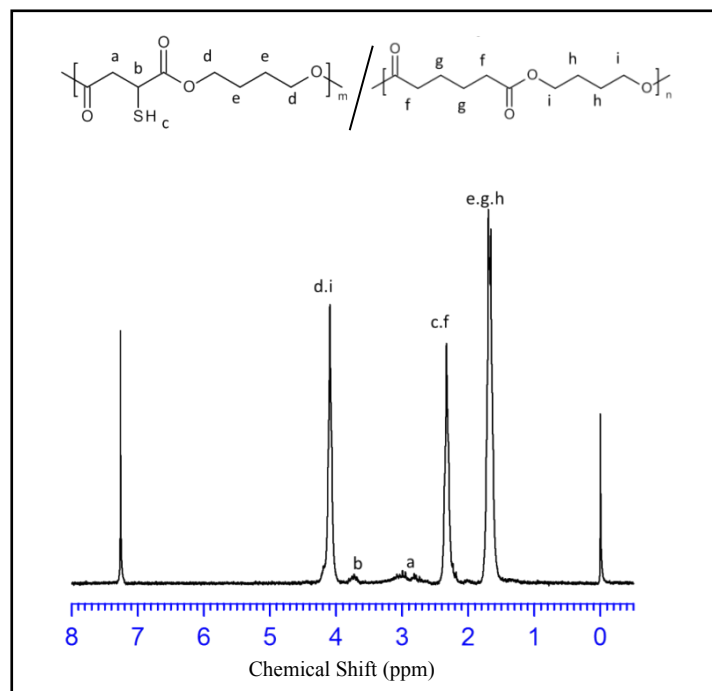

**Figure S1** <sup>1</sup>H NMR spectrum of poly[(butylene thiomalate)-co- (butylene adipate)] in CDCl<sub>3</sub>.

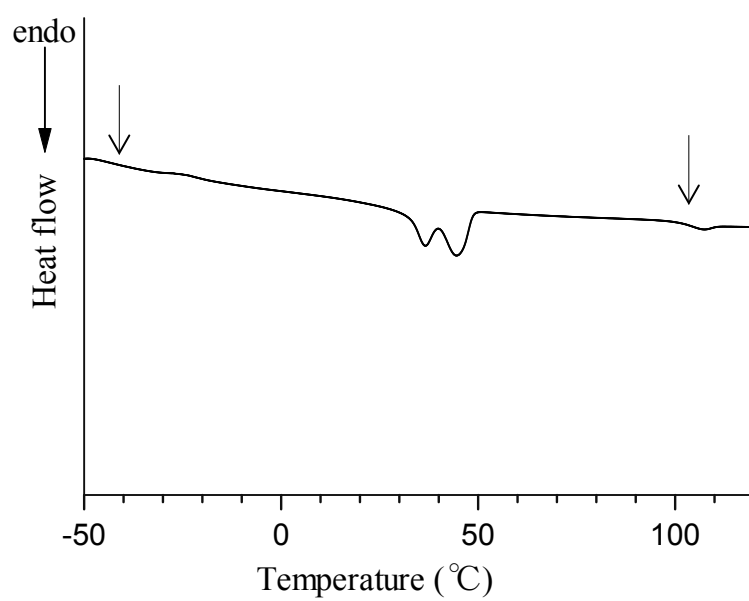

**Figure S2** DSC traces of Polyester/PSt blend. Heating rate, 10°C/min.

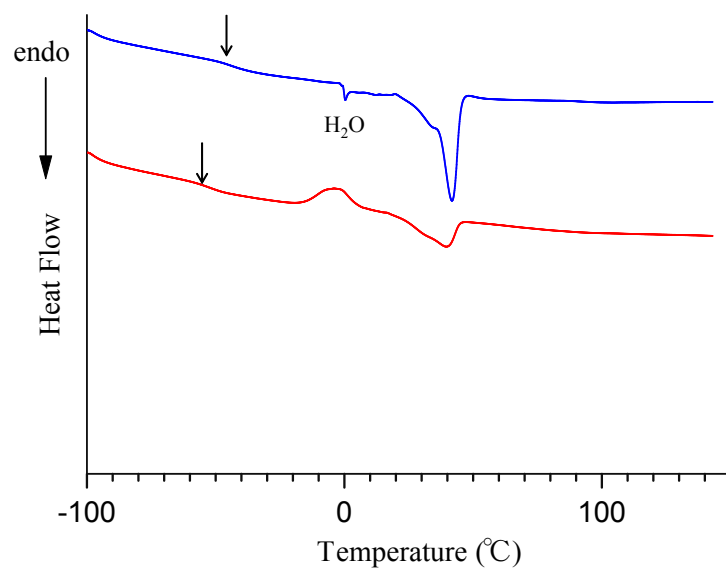

**Figure S3** DSC traces of PSt@CDI gel (red line) and the CDI gel (blue line). Heating rate, 10 °C/min.

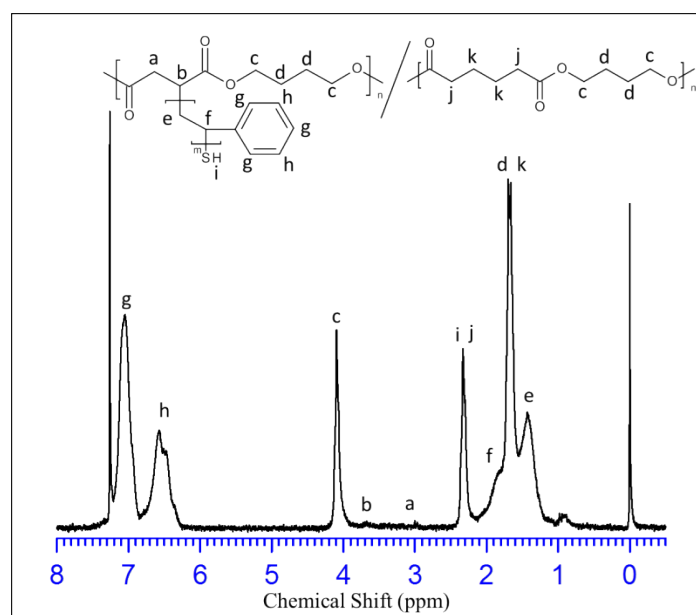

**Figure S4**  $^1\text{H}$  NMR spectrum of poly[(butylene thiomalate)-*co*-(butylene adipate)]-*graft*-poly(styrene) in  $\text{CDCl}_3$ .

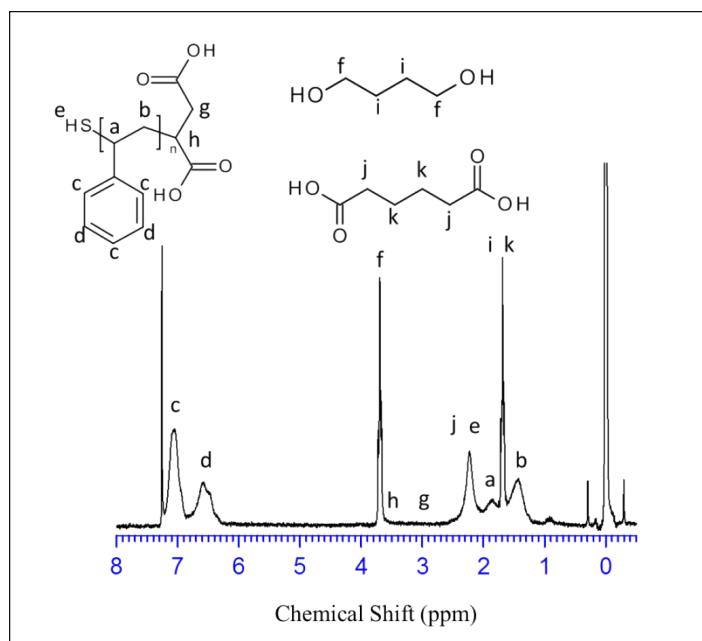

**Figure S5**  $^1\text{H}$  NMR spectrum of poly(styrene) branches derived from saponification of the corresponding RAFT gel in  $\text{CDCl}_3$ .
